# Supplementary material for: Retinal biomarkers and pharmacological targets for Hermansky-Pudlak syndrome 7
Source: PubMed Central journal article supplement (PMC7055265; doi:10.1038/s41598-020-60931-5), 2020-03-04

# Retinal biomarkers and pharmacological targets for Hermansky-Pudlak syndrome 7

Giovanni Luca Romano<sup>1,2†</sup>, Chiara Bianca Maria Platania<sup>2†</sup>, Gian Marco Leggio<sup>2,3†</sup>, Sebastiano Alfio Torrisi<sup>2</sup>, Salvatore Giunta<sup>2</sup>, Salvatore Salomone<sup>2,3</sup>, Michele Purrello<sup>2</sup>, Marco Ragusa<sup>2,4</sup>, Cristina Barbagallo<sup>2</sup>, Frank J Giblin<sup>5</sup>, Rosa Mastrogiacomo<sup>6</sup>, Francesca Managò<sup>6</sup>, Maurizio Cammalleri<sup>7</sup>, Francesco Papaleo<sup>6</sup>, Filippo Drago<sup>2,3</sup>, and Claudio Bucolo<sup>2,3,5\*</sup>

**Table 1S. Pathways dysregulated in the Dys<sup>-/-</sup> retina – Tarbase prediction (miR-101-3p, miR-186-5p, miR-382-5p)**

| KEGG pathway                                       | p-value     | #genes | #miRNAs |
|----------------------------------------------------|-------------|--------|---------|
| <b>Protein processing in endoplasmic reticulum</b> | 5.23E-07    | 45     | 3       |
| <b>Endocytosis</b>                                 | 5.23E-07    | 55     | 3       |
| Adherens junction                                  | 5.23E-07    | 24     | 3       |
| Lysine degradation                                 | 1.12E-06    | 14     | 3       |
| <b>TGF-beta signaling pathway</b>                  | 6.39E-06    | 22     | 2       |
| Proteoglycans in cancer                            | 4.00E-05    | 43     | 3       |
| Adrenergic signaling in cardiomyocytes             | 0.000451986 | 30     | 3       |
| Colorectal cancer                                  | 0.001121462 | 18     | 3       |
| Thyroid hormone signaling pathway                  | 0.001124907 | 27     | 3       |
| Renal cell carcinoma                               | 0.001124907 | 18     | 3       |
| Hippo signaling pathway                            | 0.001608411 | 35     | 3       |
| N-Glycan biosynthesis                              | 0.002511303 | 8      | 3       |
| <b>Long-term potentiation</b>                      | 0.003314069 | 20     | 2       |
| Citrate cycle (TCA cycle)                          | 0.005242178 | 10     | 3       |
| Rap1 signaling pathway                             | 0.005253159 | 41     | 3       |
| Bacterial invasion of epithelial cells             | 0.005821178 | 20     | 3       |
| Axon guidance                                      | 0.008547487 | 27     | 3       |
| Gap junction                                       | 0.008547487 | 17     | 3       |
| <b>Long-term depression</b>                        | 0.008962452 | 14     | 2       |
| Pathways in cancer                                 | 0.008962452 | 74     | 3       |
| Regulation of actin cytoskeleton                   | 0.009031618 | 40     | 3       |
| Ubiquitin mediated proteolysis                     | 0.010973081 | 33     | 3       |
| Sphingolipid signaling pathway                     | 0.013210665 | 30     | 3       |
| cAMP signaling pathway                             | 0.014889036 | 40     | 3       |
| mRNA surveillance pathway                          | 0.016670219 | 25     | 3       |
| GnRH signaling pathway                             | 0.016670219 | 21     | 3       |
| mTOR signaling pathway                             | 0.016825723 | 16     | 2       |

|                                     |                    |           |          |
|-------------------------------------|--------------------|-----------|----------|
| Dorso-ventral axis formation        | 0.023078633        | 9         | 3        |
| MAPK signaling pathway              | 0.023078633        | 48        | 3        |
| Endometrial cancer                  | 0.0298516          | 14        | 3        |
| Insulin signaling pathway           | 0.029975051        | 30        | 2        |
| Neurotrophin signaling pathway      | 0.029975051        | 26        | 3        |
| <b>Melanogenesis</b>                | <b>0.035735426</b> | <b>21</b> | <b>2</b> |
| Focal adhesion                      | 0.035735426        | 40        | 3        |
| Steroid biosynthesis                | 0.036787678        | 4         | 2        |
| Central carbon metabolism in cancer | 0.037481481        | 13        | 3        |

**Figure 1S. MiR-101-3p and miR-186-5p can control melanogenesis.** Yellow genes are targets of miR-101-3p and miR-186-5p. This picture is the output of Diana miRPath software and recalls the KEGG pathway deposited in the database (KEGG permission n° 190309): <https://www.genome.jp/kegg/pathway.html>

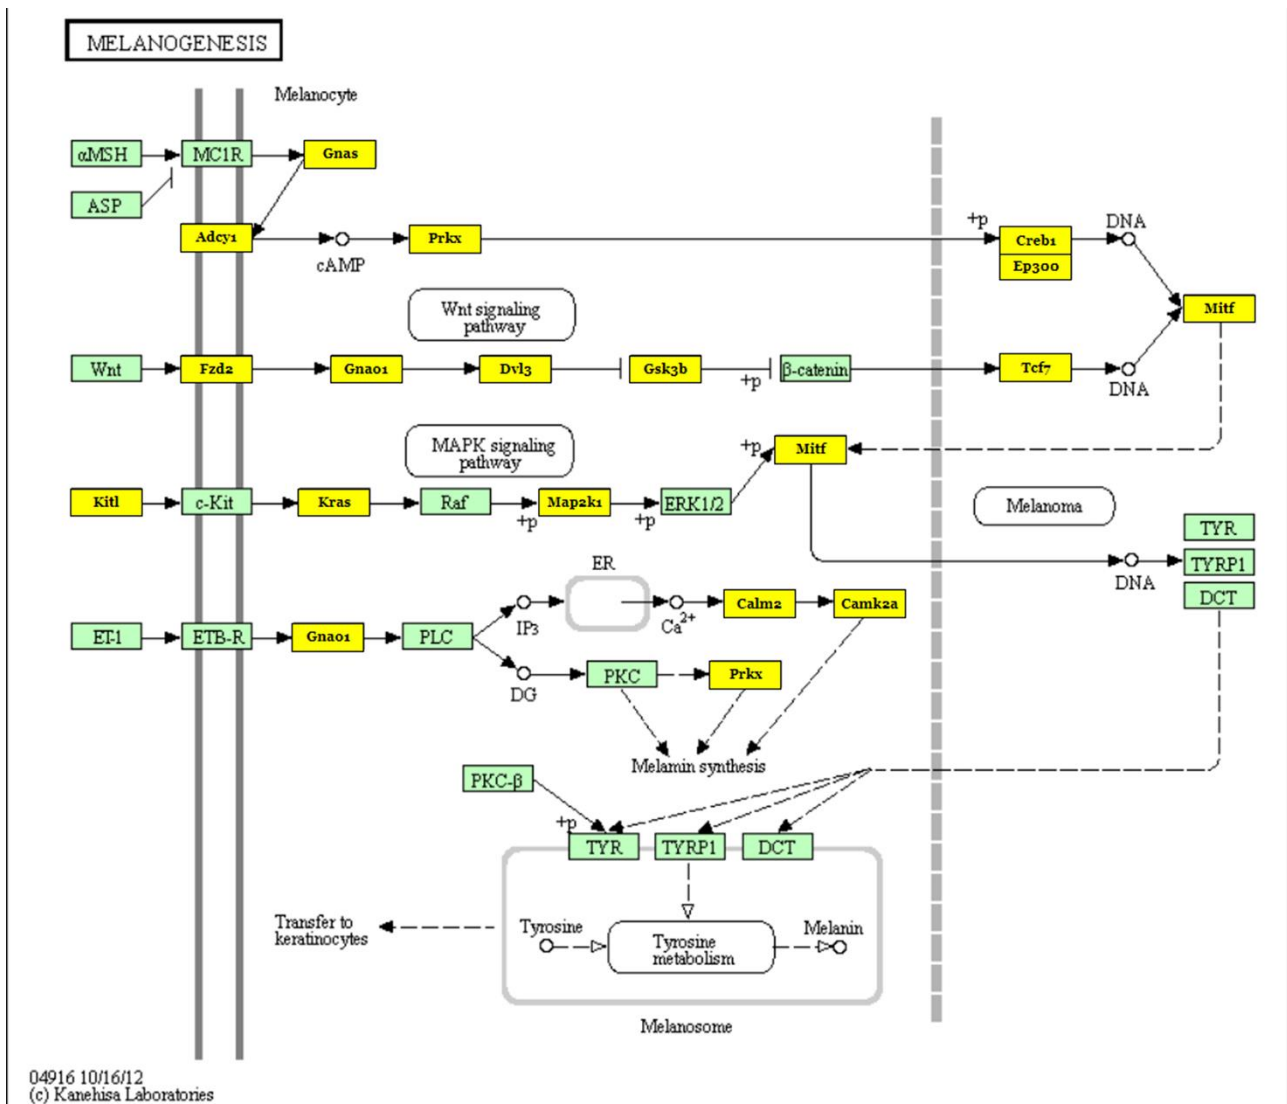

Supplement: 41598_2020_60931_MOESM1_ESM.pdf [file 41598_2020_60931_MOESM1_ESM.pdf]
